# Supplementary material for: Metallic boro-carbides of A2BC (A = Ti, Zr, Hf and W): a comprehensive theoretical study for thermo-mechanical and optoelectronic applications
Source: Royal Society of Chemistry journal article supplement (doi:10.1039/d2ra05448e), 2022-01-01
Supplement: d2ra05448e1.pdf [file d2ra05448e1.pdf]

## Metallic boro-carbides of $A_2BC$ (A=Ti, Zr, Hf and W): A comprehensive theoretical study for thermo-mechanical and optoelectronic applications

R. Islam<sup>a,b</sup>, M. M. Hossain<sup>a,b\*</sup>, M. A. Ali<sup>a,b</sup>, M. M. Uddin<sup>a,b</sup>, S. H. Naqib<sup>b,c</sup>

<sup>a</sup>Department of Physics, Chittagong University of Engineering and Technology (CUET), Chattogram-4349, Bangladesh

<sup>b</sup>Advanced Computational Materials Research Laboratory, Department of Physics, Chittagong University of Engineering and Technology (CUET), Chattogram-4349, Bangladesh

<sup>c</sup>Department of Physics, University of Rajshahi, Rajshahi 6205, Bangladesh

Corresponding authors; \*email: mukter\_phy@cuet.ac.bd

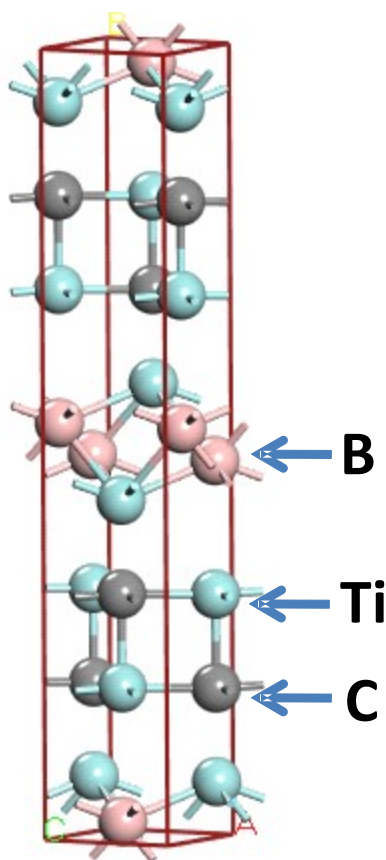

**Fig. S1:** The orthorhombic crystal structure of  $Ti_2BC$  compound.

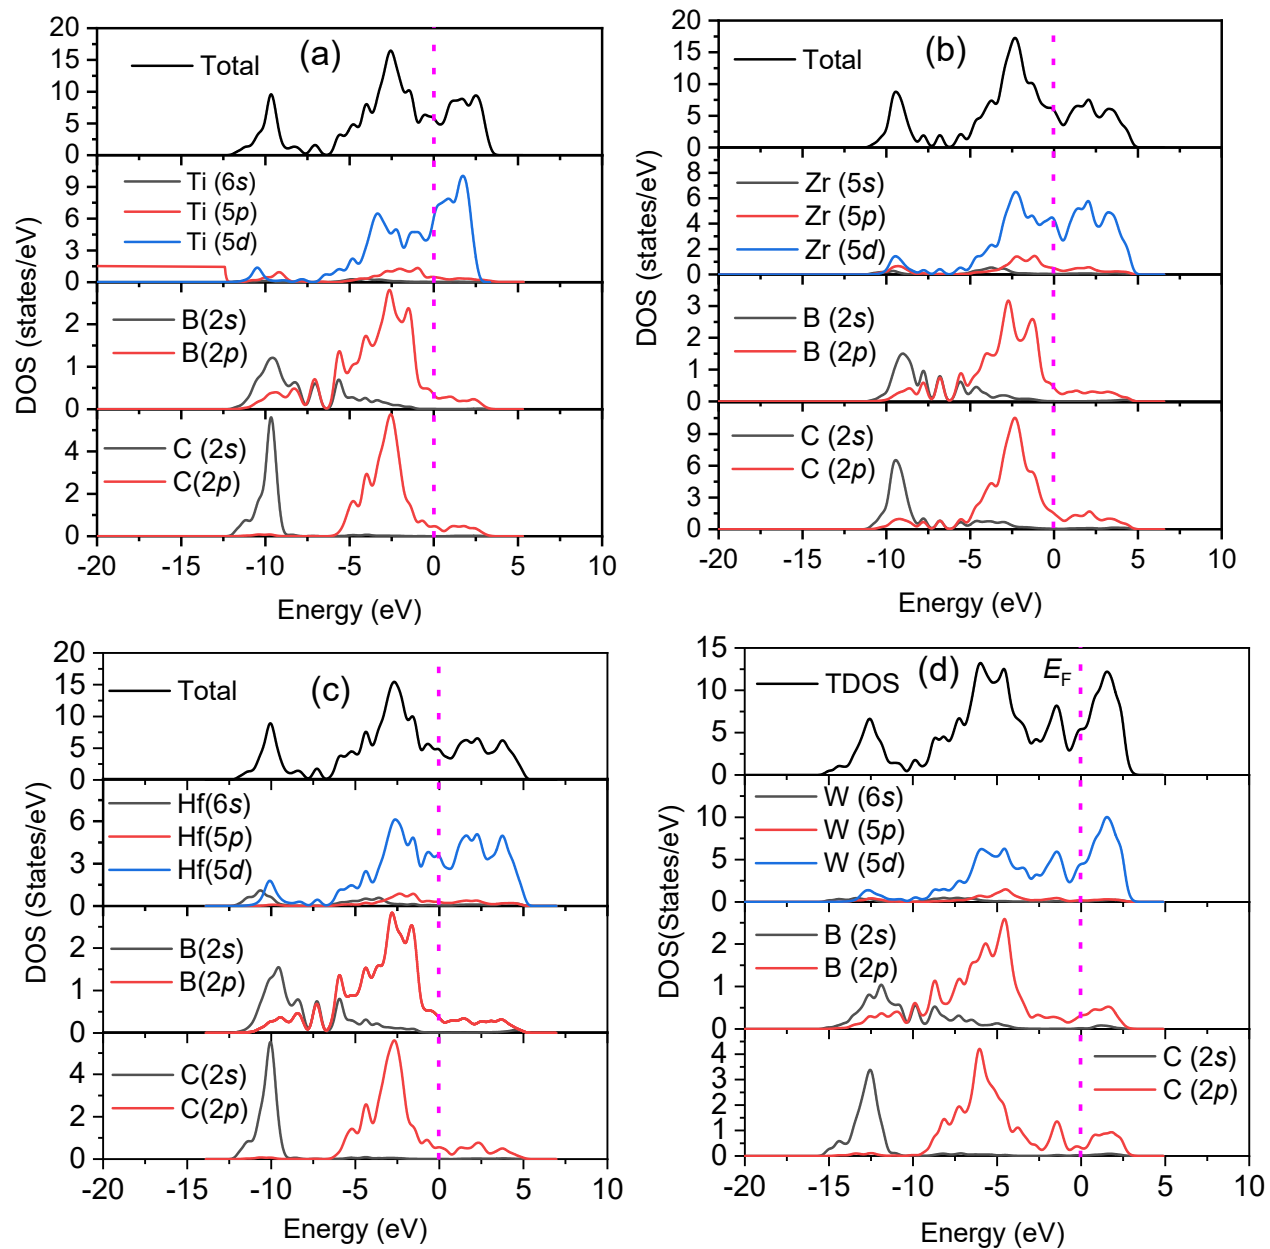

**Fig. S2:** Electronic partial density of states (DOS) for (a)  $\text{Ti}_2\text{BC}$ , (b)  $\text{Zr}_2\text{BC}$ , (c)  $\text{Hf}_2\text{BC}$  and (d)  $\text{W}_2\text{BC}$  compounds.

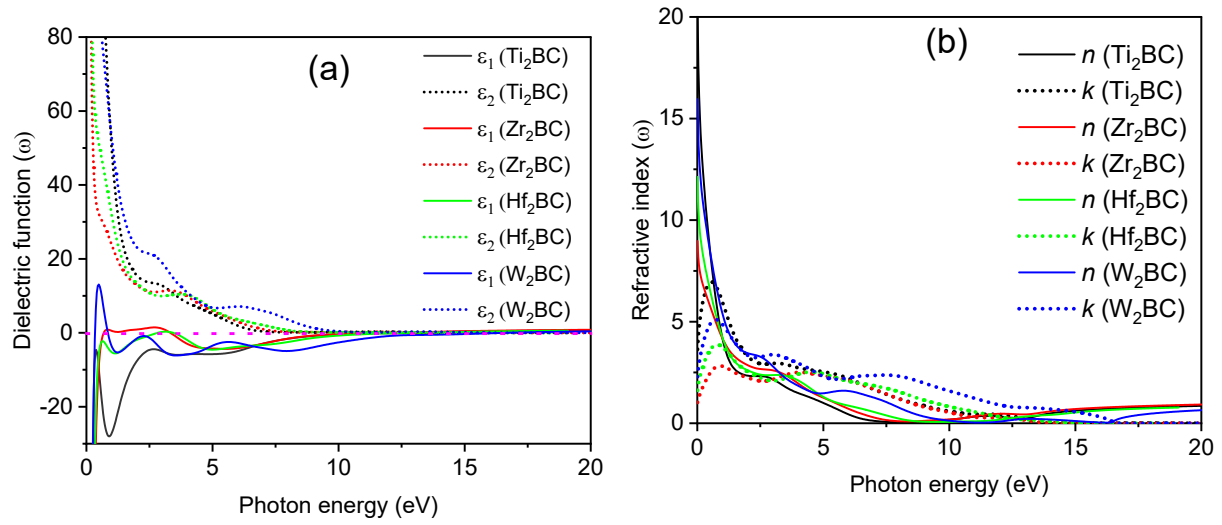

**Fig. S3:** Photon energy dependent (a) real part of dielectric function ( $\epsilon_1$ ) and imaginary part of dielectric function ( $\epsilon_2$ ), and (b) refractive index ( $n$ ) and extinction coefficient ( $k$ ) of  $A_2BC$  ( $A = \text{Ti, Zr, Hf, and W}$ ) compounds.

**Table S1:** Lattice parameters (orthorhombic),  $a$ ,  $b$  and  $c$  (all in Å), unit cell volume  $V$  (in Å<sup>3</sup>) of A<sub>2</sub>BC (A = Ti, Zr, Hf, and W) compounds and other available metallic boro-carbides compounds.

| Compound           | $a$   | $b$    | $c$   | $V$    | Ref. |
|--------------------|-------|--------|-------|--------|------|
| Ti <sub>2</sub> BC | 3.165 | 17.587 | 3.089 | 169.11 | This |
|                    | 3.169 | 17.660 | 3.048 | 170.57 | 1    |
| Zr <sub>2</sub> BC | 3.431 | 19.288 | 3.256 | 215.52 | This |
|                    | 3.437 | 19.473 | 3.273 | 219.08 | 1    |
| Hf <sub>2</sub> BC | 3.420 | 19.127 | 3.256 | 213.04 | This |
|                    | 3.388 | 19.019 | 3.226 | 207.91 | 1    |
| W <sub>2</sub> BC  | 3.115 | 17.480 | 3.068 | 167.25 | This |
|                    | 3.125 | 17.578 | 3.086 | 169.54 | 1    |
| V <sub>2</sub> BC  | 2.999 | 16.770 | 2.956 | 148.70 | 1    |
|                    | 2.998 | 16.647 | 2.948 | 147.17 | 2    |
| Nb <sub>2</sub> BC | 3.227 | 18.345 | 3.149 | 186.41 | 1    |
|                    | 3.224 | 18.239 | 3.141 | 184.71 | 2    |
| Mo <sub>2</sub> BC | 3.119 | 17.580 | 3.082 | 169.01 | 1    |
|                    | 3.137 | 17.702 | 3.094 | 171.86 | 2    |
|                    | 3.094 | 17.768 | 3.091 | 169.93 | 3    |
|                    | 3.086 | 17.350 | 3.047 | 163.14 | 4    |
| Ta <sub>2</sub> BC | 3.221 | 18.246 | 3.140 | 184.51 | 1    |
|                    | 3.267 | 18.445 | 3.180 | 191.69 | 2    |

**Table S2:** The calculated elastic stiffness constants  $C_{ij}$  (GPa) and Cauchy pressure (CP) (GPa) of  $A_2BC$  (A = Ti, Zr, Hf and W) compounds with other metallic boro-carbides.

| Compound           | $C_{11}$ | $C_{12}$ | $C_{13}$ | $C_{23}$ | $C_{22}$ | $C_{33}$ | $C_{44}$ | $C_{55}$ | $C_{66}$ | CP  | Ref. |
|--------------------|----------|----------|----------|----------|----------|----------|----------|----------|----------|-----|------|
| Ti <sub>2</sub> BC | 417      | 132      | 108      | 92       | 379      | 468      | 147      | 208      | 159      | -15 | This |
| Zr <sub>2</sub> BC | 374      | 124      | 96       | 96       | 325      | 408      | 121      | 175      | 130      | +03 | This |
| Hf <sub>2</sub> BC | 420      | 130      | 128      | 108      | 373      | 440      | 132      | 206      | 146      | -02 | This |
| W <sub>2</sub> BC  | 563      | 257      | 240      | 258      | 532      | 572      | 184      | 291      | 189      | +73 | This |
| V <sub>2</sub> BC  | 474      | 148      | 159      | 115      | 450      | 525      | 161      | 257      | 146      | -13 | 2    |
| Nb <sub>2</sub> BC | 482      | 154      | 156      | 134      | 488      | 504      | 140      | 251      | 130      | +14 | 2    |
| Mo <sub>2</sub> BC | 520      | 209      | 218      | 193      | 545      | 547      | 176      | 265      | 180      | +33 | 2    |
|                    | 551      | 211      | 204      | 210      | 566      | 553      | 168      | 241      | 182      | +43 | 3    |
| Ta <sub>2</sub> BC | 503      | 157      | 181      | 153      | 468      | 528      | 134      | 258      | 125      | +23 | 2    |

**Table S3:** Shear anisotropy factors ( $A_i$ ) where i stand for 1, 2 and 3; bulk modulus (GPa)  $B_a$ ,  $B_b$  and  $B_c$  along  $a$ -,  $b$ - and  $c$ -directions, respectively; anisotropy factors in compressibility ( $A_B$ ) and shear moduli ( $A_G$ ) (in %), and universal anisotropy index,  $A^U$  for  $A_2BC$  (A = Ti, Zr, Hf and W) compounds. The values for other metallic boro-carbides are given for comparison.

| Compound           | $A_1$ | $A_2$ | $A_3$ | $B_a$ | $B_b$ | $B_c$ | $A_B$ | $A_G$ | $A^U$ | Ref. |
|--------------------|-------|-------|-------|-------|-------|-------|-------|-------|-------|------|
| Ti <sub>2</sub> BC | 0.87  | 1.25  | 1.195 | 685   | 561   | 691   | 0.234 | 1.54  | 0.16  | This |
| Zr <sub>2</sub> BC | 0.82  | 1.30  | 1.15  | 624   | 503   | 622   | 0.22  | 1.47  | 0.15  | This |
| Hf <sub>2</sub> BC | 0.87  | 1.38  | 1.10  | 716   | 564   | 698   | 0.23  | 1.31  | 0.14  | This |
| W <sub>2</sub> BC  | 1.12  | 1.98  | 1.30  | 1066  | 1015  | 1099  | 0.015 | 2.92  | 0.30  | This |
| V <sub>2</sub> BC  | 0.94  | 1.38  | 0.93  | 809   | 663   | 833   | 0.251 | 2.134 | 0.22  | 2    |
| Nb <sub>2</sub> BC | 0.83  | 1.38  | 0.78  | 799   | 763   | 801   | 0.012 | 2.622 | 0.26  | 2    |
| Mo <sub>2</sub> BC | 1.11  | 1.50  | 1.11  | 939   | 942   | 972   | 0.005 | 1.672 | 0.17  | 2    |
| Ta <sub>2</sub> BC | 0.80  | 1.50  | 0.76  | 861   | 719   | 915   | 0.227 | 3.247 | 0.34  | 2    |

**Table S4:** Mulliken atomic and bond overlap populations of A<sub>2</sub>BC (A = Ti, Zr, Hf and W) compounds. The EVC stands for effective valence charge.

| Compound                | Atom | Atomic population |       |      |       | Bond overlap population |         |           |             |                         |                 |
|-------------------------|------|-------------------|-------|------|-------|-------------------------|---------|-----------|-------------|-------------------------|-----------------|
|                         |      | s                 | p     | d    | Total | Charge (e)              | EVC (e) | Bond      | Bond number | Bond length $d^\mu$ (Å) | Bond population |
|                         |      |                   |       |      |       |                         |         | $n^\mu$   |             | $P^\mu$                 |                 |
| <b>Ti<sub>2</sub>BC</b> | C    | 1.48              | 3.24  | 0.00 | 4.72  | -0.72                   | ---     | B-B       | 2           | 1.78777                 | 1.47            |
|                         | B    | 1.02              | 2.62  | 0.00 | 3.63  | -0.63                   | ---     | C-Ti(I)   | 4           | 2.07903                 | 0.25            |
|                         | Ti   | 2.05              | 6.60  | 2.65 | 11.30 | 0.70                    | 3.30    | C-Ti(II)  | 4           | 2.10977                 | 0.24            |
|                         | Ti   | 2.13              | 6.62  | 2.59 | 11.34 | 0.66                    | 3.34    | C-Ti(III) | 4           | 2.19435                 | 1.51            |
|                         |      |                   |       |      |       |                         |         | B-Ti(I)   | 4           | 2.32277                 | 0.89            |
|                         |      |                   |       |      |       |                         |         | B-Ti(II)  | 4           | 2.32689                 | -0.13           |
|                         |      |                   |       |      |       |                         |         | Ti-Ti(I)  | 2           | 2.89955                 | -0.25           |
| <b>Zr<sub>2</sub>BC</b> | C    | 1.50              | 3.29  | 0.00 | 4.79  | -0.79                   | ---     | B-B       | 2           | 1.87731                 | 1.42            |
|                         | B    | 1.05              | 2.59  | 0.00 | 3.63  | -0.63                   | ---     | C-Zr(I)   | 4           | 2.29162                 | 0.35            |
|                         | Zr   | 2.13              | 6.47  | 2.68 | 11.29 | 0.71                    | 3.29    | C-Zr(II)  | 4           | 2.29402                 | 0.30            |
|                         | Zr   | 2.20              | 6.50  | 2.60 | 11.29 | 0.71                    | 3.29    | C-Zr(III) | 4           | 2.36560                 | 1.42            |
|                         |      |                   |       |      |       |                         |         | B-Zr(I)   | 4           | 2.49658                 | -0.03           |
|                         |      |                   |       |      |       |                         |         | B-Zr(II)  | 4           | 2.52756                 | 0.94            |
|                         |      |                   |       |      |       |                         |         | Zr-Zr     | 2           | 3.16471                 | -0.19           |
| <b>Hf<sub>2</sub>BC</b> | C    | 1.56              | 3.32  | 0.00 | 4.89  | -0.89                   | ---     | B-B       | 2           | 1.9007                  | 1.43            |
|                         | B    | 1.18              | 2.64  | 0.00 | 3.81  | -0.81                   | ---     | C-Hf(I)   | 4           | 2.27847                 | 0.41            |
|                         | Hf   | 0.35              | -0.05 | 2.81 | 3.11  | 0.89                    | 3.11    | C-Hf(II)  | 4           | 2.30038                 | 0.48            |
|                         | Hf   | 0.43              | 0.02  | 2.73 | 3.19  | 0.81                    | 3.19    | C-Hf(III) | 4           | 2.36171                 | 1.51            |
|                         |      |                   |       |      |       |                         |         | B-Hf(I)   | 4           | 2.49895                 | -0.12           |
|                         |      |                   |       |      |       |                         |         | B-Hf(II)  | 4           | 2.50748                 | 1.14            |
|                         |      |                   |       |      |       |                         |         | Hf-Hf     | 2           | 3.12378                 | -0.24           |
| <b>W<sub>2</sub>BC</b>  | C    | 1.38              | 3.30  | 0.00 | 4.68  | -0.68                   | ---     | B-B       | 2           | 1.82386                 | 1.20            |
|                         | B    | 0.92              | 2.55  | 0.00 | 3.47  | -0.47                   | ---     | C-W(I)    | 4           | 2.10329                 | 0.14            |
|                         | W    | 2.29              | 6.50  | 4.70 | 13.49 | 0.51                    | 5.49    | C-W(II)   | 4           | 2.16423                 | 0.22            |
|                         | W    | 2.36              | 6.49  | 4.51 | 13.36 | 0.64                    | 5.36    | C-W(III)  | 4           | 2.19304                 | 1.54            |
|                         |      |                   |       |      |       |                         |         | B-W(I)    | 4           | 2.31895                 | 0.98            |
|                         |      |                   |       |      |       |                         |         | W-W       | 2           | 2.95597                 | -0.49           |
|                         |      |                   |       |      |       |                         |         | C-C       | 2           | 2.96839                 | -0.19           |

## References

- 1 H. Bolvardi, J. Emmerlich, M. to Baben, D. Music, J. von Appen, R. Dronskowski and J. M. Schneider, *J. Phys.: Condens. Matter*, 2012, **25**, 045501.
- 2 P. Barua, M. M. Hossain, M. A. Ali, M. M. Uddin, S. H. Naqib and A. K. M. A. Islam, *J. Alloys Compd.*, 2019, **770**, 523–534.
- 3 J. Emmerlich, D. Music, M. Braun, P. Fayek, F. Munnik and J. M. Schneider, *J. Phys. D: Appl. Phys.*, 2009, **42**, 185406.
- 4 J.-O. Bovin, M. O’Keeffe and L. Stenberg, *J. Solid State Chem.*, 1977, **22**, 221–231.
